# Supplementary material for: Identifying RNA-binding residues based on evolutionary conserved structural and energetic features
Source: PubMed Central journal article supplement — Nucleic Acids Res. 2013 Dec 14;42(3):e15. doi: 10.1093/nar/gkt1299 (PMC3919582; doi:10.1093/nar/gkt1299), 2013-12-14
Supplement: supp_gkt1299_nar-03422-2013-File002.pdf [file supp_gkt1299_nar-03422-2013-File002.pdf]

# Identifying RNA-binding residues based on evolutionary conserved structural and energetic features

Yao Chi Chen<sup>1</sup>, Karen Sargsyan<sup>1</sup>, **Jon Wright<sup>1,2</sup>**, Yi-Shuian Huang<sup>1\*</sup>, and Carmay Lim<sup>1,2,\*</sup>

<sup>1</sup>Institute of Biomedical Sciences, Academia Sinica, Taipei 115, Taiwan,

<sup>2</sup>Genomics Research Center, Academia Sinica, Taipei 115, Taiwan, and

<sup>3</sup>Department of Chemistry, National Tsing Hua University, Hsinchu 300, Taiwan

\*To whom correspondence should be addressed. E-mail: [carmay@gate.sinica.edu.tw](mailto:carmay@gate.sinica.edu.tw) or [yishuian@ibms.sinica.edu.tw](mailto:yishuian@ibms.sinica.edu.tw)

## MATERIALS AND METHODS

### Plasmid construction

The various CPEB3 alanine mutants were generated by QuikChange Site-Directed Mutagenesis Kit (Stratagene) according to the manufacturer's protocol. The pcDNA3.1-myc-hCPEB3 plasmid was used as the PCR template and the sets of sense and antisense primers used for mutagenesis were: R427A, 5'-GAGTAGAACGCTACTCTGCAAAGGTGTTTGGAGG-3' and 5'-CCTCCAACAAACACCTTTGCAGAGTAGCGTTCTACTC-3'; R449A, 5'-CACTGCCAGCTTTCGCGCGTTTGGACCTCTCGTAG-3' and 5'-CTACGAGAGGTCCAAACGCGCGAAAGCTGGCAGTG-3'; D456A, 5'-TGGACCTCTCGTAGTAGCCTGGCCTCACAAAGCT-3' and 5'-AGCTTTGTGAGGCCAGGCTACTACGAGAGGTCCA-3'; K460A, 5'-AGTAGACTGGCCTCACGCAGCTGAAAGCAAGTCTTA-3' and 5'-TAAGACTTGCTTTCAGCTGCGTGAGGCCAGTCTACT-3'; S465A, 5'-CACAAAGCTGAAAGCAAGGCTTATTTTCCTCCTAAAGGC-3' and 5'-GCCTTTAGGAGGAAAATAAGCCTTGCTTTCAGCTTTGTG-3'; F474A, 5'-CTCCTAAAGGCTATGCCGCTCTGCTGTTCCAAGAGG-3' and 5'-CCTCTTGGAACAGCAGAGCGGCATAGCCTTTAGGAG-3'; **R514A, 5'-GACAAGCCAGTGCAAATTGCACCATGGAACCTAAGTGA-3' and 5'-TCACTTAGGTTCCATGGTGCAATTTGCACTGGCTTGTC-3'**. To construct F430A and G432A mutants, the sense primer, F430A 5'-TACTCTAGAAAGGTGGCTGTTGGAGGACTTCCT-3' or G432A 5'-TACTCTAGAAAGGTGTTTGTGTCAGGACTTCCTCCTGATA-3', along with the antisense primer 5'-CCGCTCGAGTCAGCTCCAGCGGAAC-3' were used to PCR amplify the RNA-binding domain of CPEB3. The amplified DNA fragments were digested with XbaI and XhoI and cloned to the XbaI and XhoI-linearized pcDNA3.1-myc-hCPEB3 vector. All constructs were sequenced to confirm the mutations.

### Cell culture and transfection

HEK-293T cells were cultured in DMEM with 10% fetal bovine serum (Invitrogen). Transfection of plasmid DNAs was carried out using lipofectamine 2000 (Invitrogen) following the manufacture's protocol. In general, a 35-mm dish of 293T cells was transfected with the mixture of 2 µg plasmid DNA and 5 µl lipofectamine 2000 and incubated overnight for CPEB3 production.

The 35-mm dish of 293T cells expressing myc-tagged CPEB3 variants was lysed in 140 µl of 2X gel retardation buffer (20 mM HEPES, pH 7.4, 100 mM KCl, 2 mM

MgCl<sub>2</sub>, 0.1% TritonX-100, 10% glycerol, 0.5 mM DTT and 1X protease inhibitor (Roche)) on ice for 15 min, followed by centrifugation at 10,000 rpm for 5 minutes. The resulting supernatants were used for RNA-binding assay. The 1904 RNA probe identified previously as the CPEB3-binding sequence (1) was labelled by *in vitro* transcription with  $\alpha^{32}\text{P}$ -UTP.

## REFERENCES

1. Huang, Y.S., Kan, M.C., Lin, C.L. and Richter, J.D. (2006) CPEB3 and CPEB4 in neurons: analysis of RNA-binding specificity and translational control of AMPA receptor GluR2 mRNA. *EMBO J*, **25**, 4865-4876.

## Supplementary Table S1

| Dataset I |                  | Dataset II |                  | RMSD (Å) | Sequence id (%) |
|-----------|------------------|------------|------------------|----------|-----------------|
| PDB code  | chain identifier | PDB code   | chain identifier |          |                 |
| 1a9n      | C                |            |                  |          |                 |
| 1av6      | A                | 2gaf       | A                | 0.68     | 98              |
| 1c0a      | A                | 1eqr       | A                | 1.64     | 100             |
| 1ddl      | A                |            |                  |          |                 |
| 1dfu*     | P                | 1b75*      | A                | 4.26     | 100             |
| 1di2      | A                |            |                  |          |                 |
| 1f7u      | A                | 1bs2       | A                | 2.22     | 100             |
| 1feu*     | A                |            |                  |          |                 |
| 1fjg*     | M                |            |                  |          |                 |
| 1fxl      | A                |            |                  |          |                 |
| 1gax      | A                |            |                  |          |                 |
| 1gtf      | L                | 2zcz       | A                | 1.78     | 97              |
| 1h4s      | A                | 1h4t       | A                | 1.28     | 100             |
| 1hq1      | A                |            |                  |          |                 |
| 1j1u      | A                | 1u7x       | A                | 1.5      | 98              |
| 1jbs      | A                | 1aqz       | A                | 0.71     | 99              |
| 1jid      | A                |            |                  |          |                 |
| 1k8w      | A                | 1r3f       | A                | 1.95     | 98              |
| 1m8w      | A                | 3gvt       | A                | 1.24     | 91              |
| 1mms*     | A                | 2k3f*      | A                | 4.17     | 100             |
| 1n78      | A                | 1j09       | A                | 1.86     | 100             |
| 1ooa      | A                | 2v2t       | B                | 8.87     | 99              |
| 1q2r      | A                | 1enu       | A                | 0.87     | 100             |
| 1qf6      | A                | 1evk       | A                | 1.32     | 100             |
| 1sds      | C                | 1ra4       | A                | 0.35     | 100             |
| 1ser      | A                |            |                  |          |                 |
| 1vq8*     | 1                |            |                  |          |                 |
| 1vq8*     | 3                |            |                  |          |                 |
| 1vq8*     | A                |            |                  |          |                 |
| 1vq8*     | B                |            |                  |          |                 |
| 1vq8*     | C                |            |                  |          |                 |
| 1vq8*     | D                |            |                  |          |                 |
| 1vq8*     | E                |            |                  |          |                 |
| 1vq8*     | H                |            |                  |          |                 |
| 1vq8*     | J                |            |                  |          |                 |

|       |   |       |   |      |     |
|-------|---|-------|---|------|-----|
| 1vq8* | K |       |   |      |     |
| 1vq8* | L |       |   |      |     |
| 1vq8* | M |       |   |      |     |
| 1vq8* | N |       |   |      |     |
| 1vq8* | O |       |   |      |     |
| 1vq8* | P |       |   |      |     |
| 1vq8* | Q |       |   |      |     |
| 1vq8* | R |       |   |      |     |
| 1vq8* | U |       |   |      |     |
| 1vq8* | V |       |   |      |     |
| 1vq8* | W |       |   |      |     |
| 1vq8* | X |       |   |      |     |
| 1wpu  | A | 1wpt  | A | 2.23 | 100 |
| 1yz9  | A | 1rc5  | A | 1.37 | 98  |
| 1zh5  | A |       |   |      |     |
| 1zho  | A | 487d  | H | 5.78 | 98  |
| 2a8v  | A | 1a63  | A | 1.9  | 100 |
| 2anr  | A |       |   |      |     |
| 2asb  | A | 1k0r  | A | 1.08 | 98  |
| 2bgg  | A | 1w9h  | A | 0.97 | 98  |
| 2bu1  | A | 1msc  | A | 3.34 | 99  |
| 2e9t  | A | 1u09  | A | 0.78 | 100 |
| 2fk6  | A | 1y44  | B | 1.99 | 99  |
| 2fmt  | A | 1fmt  | A | 1.17 | 100 |
| 2gic  | A | 3hhw  | K | 1.74 | 99  |
| 2j01* | I |       |   |      |     |
| 2j01* | R | 1gd8* | A | 1.25 | 100 |
| 2q66  | A | 1fa0  | A | 3.55 | 96  |
| 2r8s  | L | 1dee  | A | 3.65 | 95  |
| 2vqe* | B |       |   |      |     |
| 2vqe* | C |       |   |      |     |
| 2vqe* | D |       |   |      |     |
| 2vqe* | F |       |   |      |     |
| 2vqe* | G | 1rss* | A | 2.93 | 100 |
| 2vqe* | H | 1an7* | A | 1.05 | 100 |
| 2vqe* | I |       |   |      |     |
| 2vqe* | J |       |   |      |     |
| 2vqe* | K |       |   |      |     |
| 2vqe* | N |       |   |      |     |
| 2vqe* | P | 1emw* | A | 2.42 | 100 |
| 2vqe* | R |       |   |      |     |

|       |   |       |   |      |     |
|-------|---|-------|---|------|-----|
| 2vqe* | S | 1qkf* | A | 4.09 | 100 |
| 2vqe* | T |       |   |      |     |
| 2zue  | A |       |   |      |     |
| 3gib  | A | 1u1t  | A | 0.93 | 93  |
| 3iev  | A |       |   |      |     |

\* denotes ribosomal proteins

**Supplementary Table S2.** Performance of DR\_bind1 and BindN+ for the same number of predictions made by DR\_bind1 based on the RNA-bound structures of 17 proteins whose sequences are nonhomologous to those in PRINR25 compared.

| Methods     | DR_bind1    | BindN+ |
|-------------|-------------|--------|
| precision   | <b>0.74</b> | 0.47   |
| sensitivity | 0.08        | 0.05   |
| specificity | 1           | 0.99   |
| accuracy    | 0.90        | 0.89   |
| mcc         | 0.22        | 0.12   |

**Supplementary Table S3.** Performance of DR\_bind1 based on 83 DNA-bound protein structures.

|                  | DR_bind1 <sup>a</sup> |
|------------------|-----------------------|
| TP               | 177                   |
| FP               | 84                    |
| TN               | 18,866                |
| FN               | 1,922                 |
| Sensitivity      | 0.08                  |
| Specificity      | 1                     |
| <b>Precision</b> | <b>0.68</b>           |
| Accuracy         | 0.90                  |
| MCC              | 0.22                  |
